# Supplementary material
Source: PubMed Central journal article supplement (PMC5840016)
Supplement: NIHMS936437-supplement-1.pdf [file NIHMS936437-supplement-1.pdf]

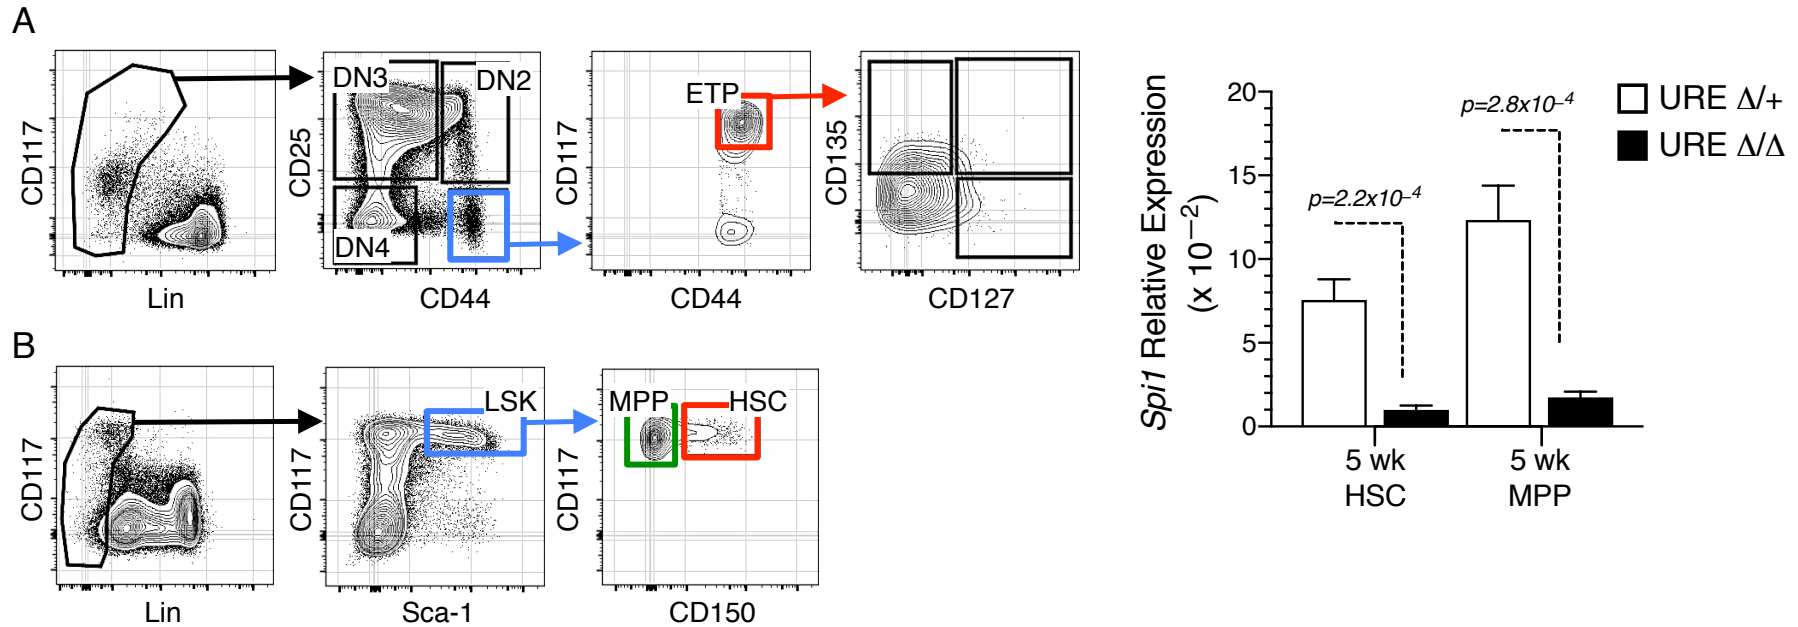

**Fig. S1. Gating strategies used to resolve thymocytes progenitors, HSCs and MPPs from URE $\Delta/\Delta$ , URE $\Delta/+$  and B6 mice and expression level of *Spi1* in fetal URE $\Delta/\Delta$  and URE $\Delta/+$  ETPs.** (A) Representative FACS plots showing the successive gating steps used to define Lineage negative (Lin<sup>-</sup>) CD117<sup>+</sup> CD44<sup>+</sup> CD25<sup>-</sup> ETPs (which can be further subdivided using anti-CD135 and CD127 antibodies), Lin<sup>-</sup> CD44<sup>+</sup> CD25<sup>+</sup> DN2, Lin<sup>-</sup> CD44<sup>-</sup> CD25<sup>+</sup> DN3 and Lin<sup>-</sup> CD44<sup>-</sup> CD25<sup>+</sup> DN4 thymocytes in 9 wk old B6 thymus. Thymuses from 3 mice were pooled for this particular stain. (B) Representative FACS plots showing the successive gating steps used to define Lineage negative (Lin<sup>-</sup>) CD117<sup>+</sup> CD150<sup>+</sup> HSCs and Lin<sup>-</sup> CD117<sup>+</sup> CD150<sup>-</sup> MPPs in the bone marrow of 5 wk old URE $\Delta/+$  mice. Bone marrow cells from 3 mice were pooled for this particular stain. A simplified HSC staining strategy was used to stain/purify HSCs in this study, because URE $\Delta/\Delta$  bone marrow cells do not express CD135 (30). (C) Expression of *Spi1* relative to *Gapdh* determined by qPCR in HSCs and MPPs isolated from 5wk old URE $\Delta/\Delta$  and WT mice. qPCR reactions were performed in triplicate using 2 independent samples for each ETP population. Mean  $\pm$  SEM and p values are shown.

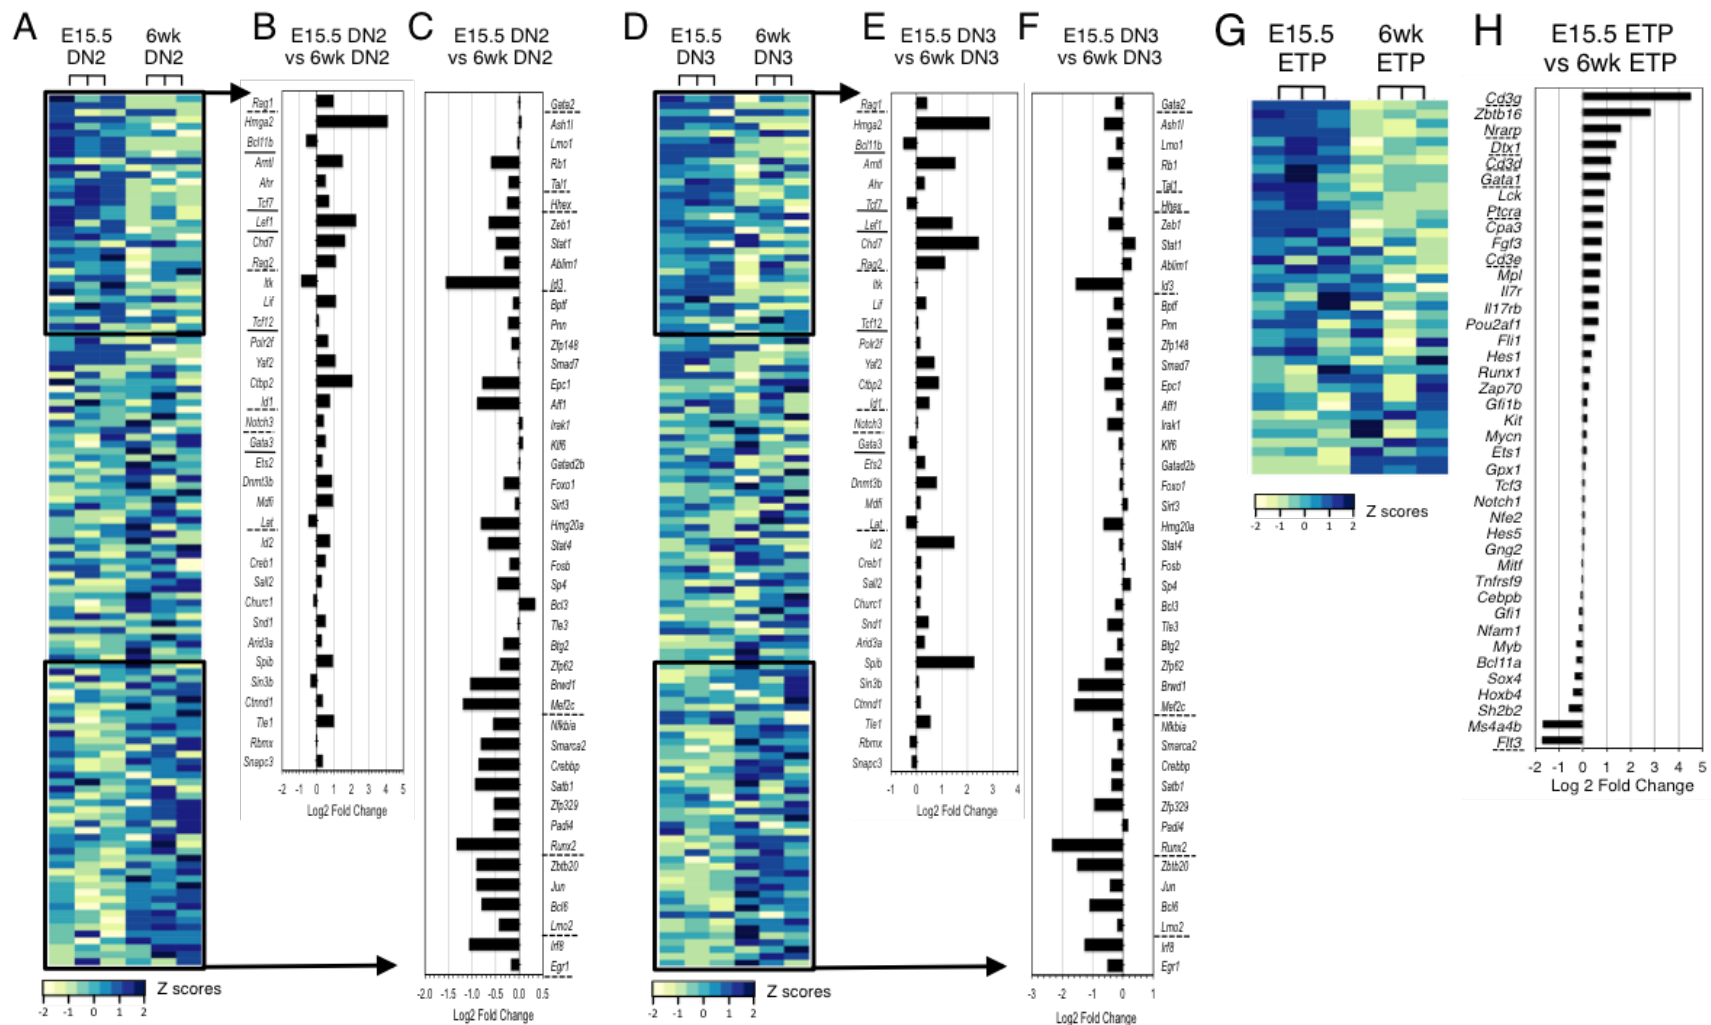

**Fig. S2. Expression of key T lineage transcription factors differs between fetal and adult DN2, DN3 and ETP progenitors.** (A) Heatmap showing the expression of selected transcription factors in DN2 progenitors isolated from E15.5 and 6 wk old B6 mice. (B) Log<sub>2</sub> fold change of the transcription factors whose expression is higher in fetal than adult DN2 cells (E15.5 versus 6 wk). (C) Log<sub>2</sub> fold change of the transcription factors whose expression is lower in fetal than adult DN2 cells (E15.5 versus 6 wk). (D) Heatmap showing the expression of selected transcription factors in DN3 progenitors isolated from E15.5 and 6 wk old B6 mice. (E) Log<sub>2</sub> fold change of the transcription factors whose expression is higher in fetal than adult DN3 cells (E15.5 versus 6 wk ratios). (F) Log<sub>2</sub> fold change of the transcription factors whose expression is lower in fetal than adult DN3 cells (E15.5 versus 6 wk ratios). (G) Heatmap showing the expression of PU.1 target genes in ETPs isolated from E15.5 and 6 wk old B6 mice. (H) Log<sub>2</sub> fold change of these genes in ETPs isolated from E15.5 embryos versus 6 wk old mice. Log<sub>2</sub> intensities were obtained from microarray data deposited by Belyaev et al (GSE24142) (23). The complete gene list is included in Supplemental Table 2. Dark blue: high expression levels; pale green: low expression levels. All genes were included in the 4,970 probes that passed the  $p < 0.05$  filter following ANOVA test as described by Belyaev et al. (23). Z-scores are shown for 3 independent samples for each mouse age.

**Supplemental Table 1: List of antibodies used for isolation of hematopoietic cells\*.**

|                              | <i>Antibody</i> | <i>Clone</i>     | <i>Source</i>          |
|------------------------------|-----------------|------------------|------------------------|
| <i>Fcγ Blocking</i>          | CD16/32         | FcγRII-III; 93   | Life Technologies      |
| <i>Lineage cocktail</i>      |                 |                  |                        |
|                              | CD3α            | 145-2C11         | Life Technologies      |
|                              | CD8α            | 53-6.1           | Life Technologies      |
|                              | Gr-1            | RB6-8C5          | Life Technologies      |
|                              | IgM             | —                | Southern Biotechnology |
|                              | NK1.1           | PK136            | Life Technologies      |
|                              | TCRβ            | H57-597          | Life Technologies      |
|                              | TCRγδ           | UC7-13D5         | Life Technologies      |
|                              | Ter-119         | Ter-119          | Life Technologies      |
|                              | CD11b           | M1/70            | Life Technologies      |
| <i>HSC / MPP</i>             |                 |                  |                        |
|                              | CD117           | 2B8              | Life Technologies      |
|                              | CD150           | TCI5-12F12.2     | Biologend              |
|                              | Sca-1           | D7               | Life Technologies      |
|                              | CD135           | A2F10            | Biologend              |
| <i>ETP / DN2 / DN3 / DN4</i> |                 |                  |                        |
|                              | CD117           | 2B8              | Life Technologies      |
|                              | CD44            | IM7              | BD Biosciences         |
|                              | CD25            | PC61.5           | Life Technologies      |
|                              | CD135           | A2F10            | Biologend              |
| <i>CD4 / CD8</i>             |                 |                  |                        |
|                              | CD4             | L3T4/GK1.5/RM4-5 | Life Technologies      |
|                              | CD8α            | 53-6.7           | Life Technologies      |

\* Optimal working dilutions of all antibodies were determined before use. *HSC*, Hematopoietic stem cell; *MPP*, Multipotent progenitor; *ETP*, Early Thymic Progenitor.
